# Supplementary material for: Excellent luminescent thermal stability of Dy3+/Sm3+ co-activated multifunctional titanate single-phase phosphors
Source: Royal Society of Chemistry journal article supplement (doi:10.1039/d4dt02265c), 2024-01-01
Supplement: d4dt02265c1.pdf [file d4dt02265c1.pdf]

## Supporting Information

### **Excellent luminescent thermal stability of Dy<sup>3+</sup>/Sm<sup>3+</sup> co-activated multifunctional titanate single-phase phosphors**

Feiyan Xie,<sup>a\*</sup> Junqiang Gu,<sup>b</sup> Jiao Zou,<sup>a</sup> Zhu Liu,<sup>a</sup> Baojun Chen,<sup>a</sup> and Juling Xu<sup>a</sup>

<sup>a</sup>School of Chemistry and Materials Engineering, Huizhou University, Huizhou 516007, China

<sup>b</sup>College of Chemistry and Chemical Engineering, Jiangxi Normal University, Nanchang 330022, China

\* Corresponding author.

Email: xfy@hzu.edu.cn

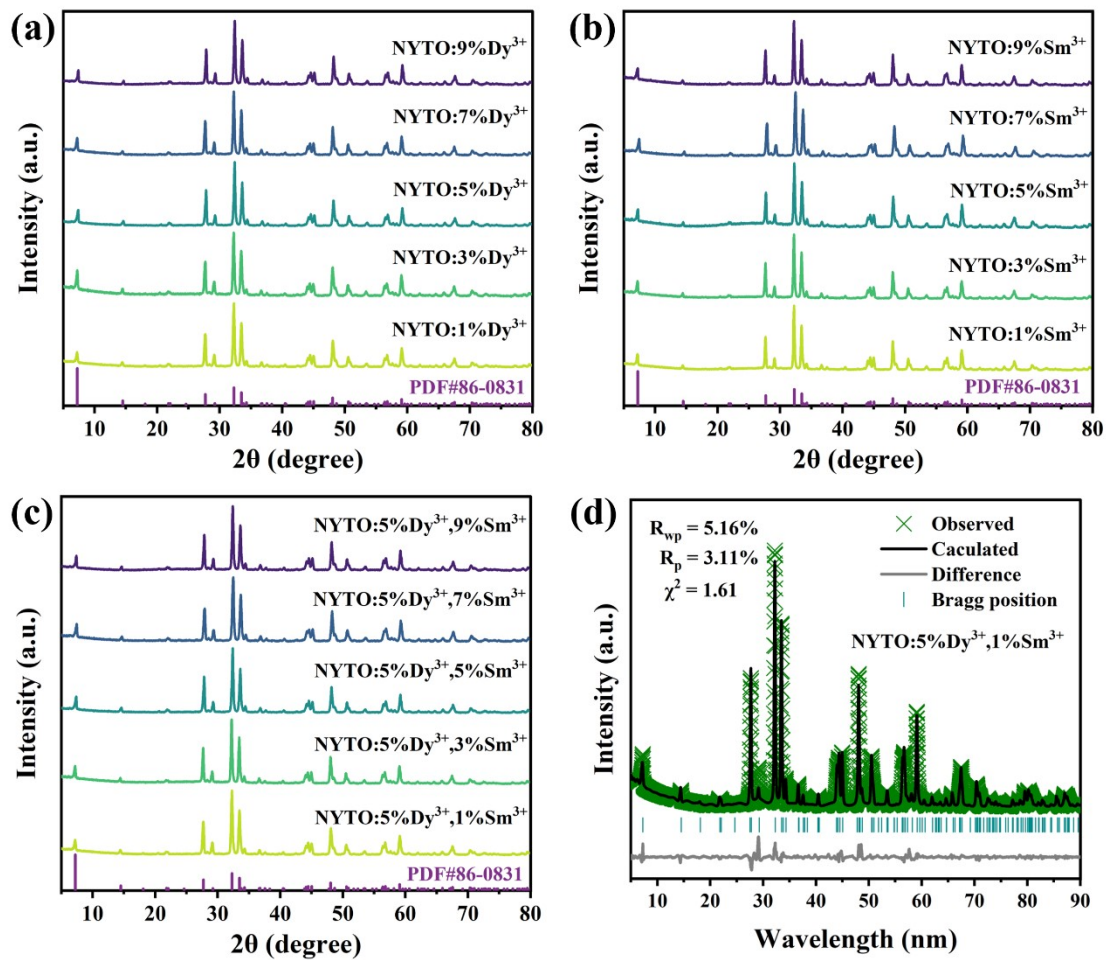

**Figure S1.** XRD pattern of samples compared to the standard pattern (a) NYTO: $x\text{Dy}^{3+}$ ; (b) NYTO: $y\text{Sm}^{3+}$  and (c) NYTO: $5\%\text{Dy}^{3+},y\text{Sm}^{3+}$ . (d) Rietveld refinement of XRD data for the as-synthesized NYTO: $5\%\text{Dy}^{3+},1\%\text{Sm}^{3+}$  phosphor.

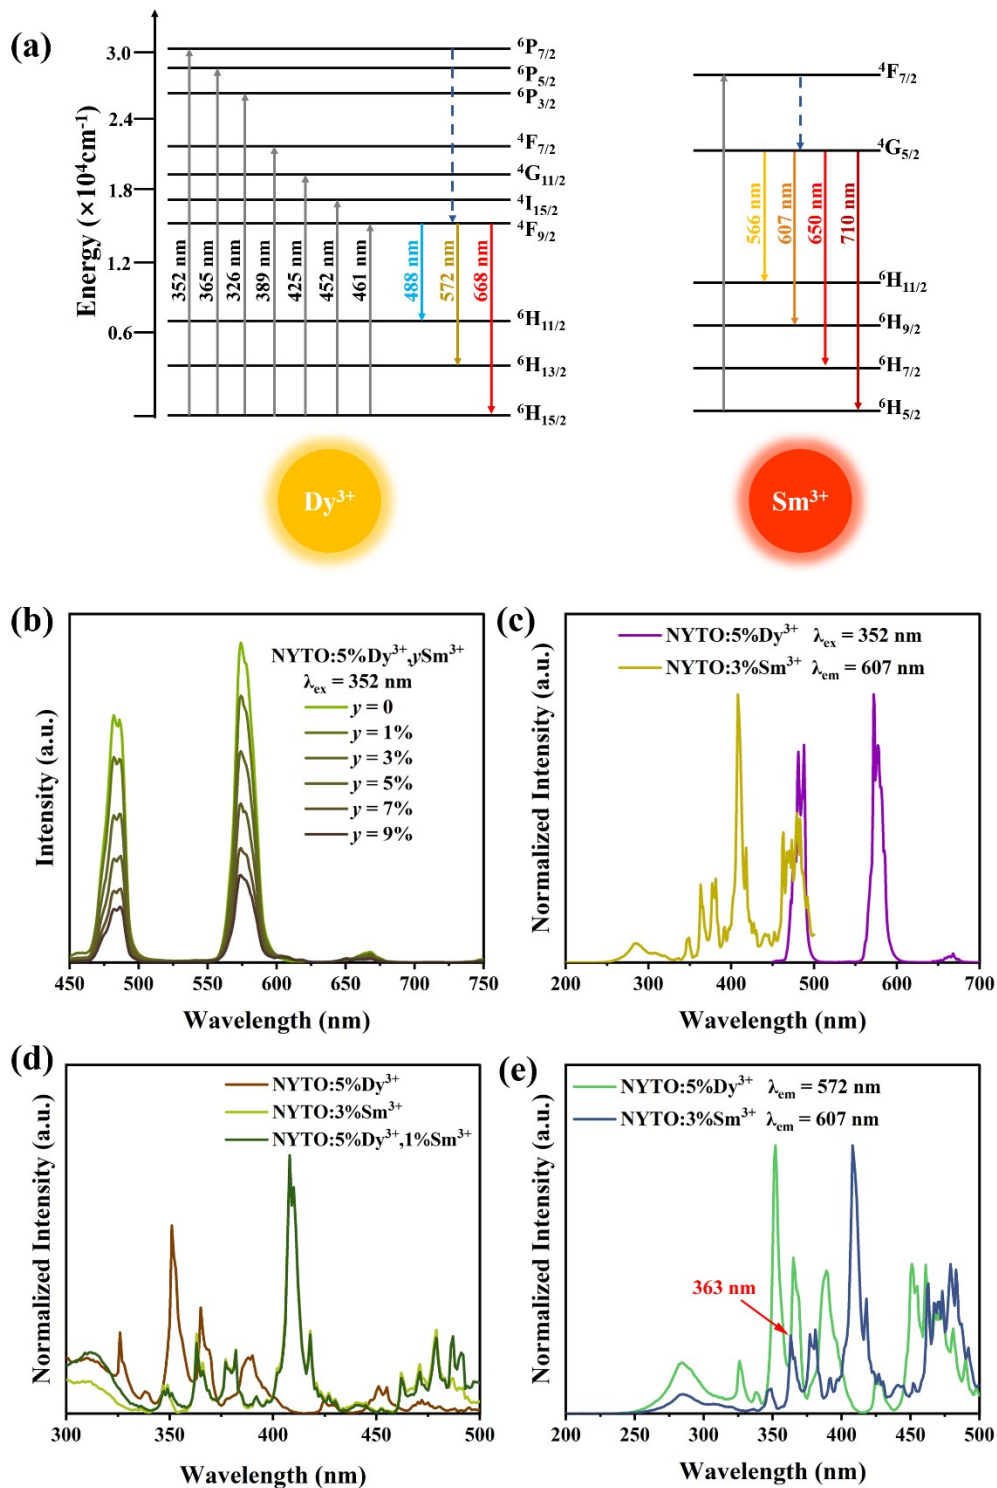

**Figure S2.** (a) Schematic energy-level diagram of Dy<sup>3+</sup> and Sm<sup>3+</sup>. (b) The PL spectra of NYTO:5%Dy<sup>3+</sup>,<sub>y</sub>Sm<sup>3+</sup> phosphors ( $\lambda_{\text{ex}} = 352 \text{ nm}$ ). (c) PLE spectrum of NYTO:3%Sm<sup>3+</sup> phosphor and PL spectrum of NYTO:5%Dy<sup>3+</sup> phosphor. (d) PLE spectra of NYTO:5%Dy<sup>3+</sup>, NYTO:3%Sm<sup>3+</sup> and NYTO:5%Dy<sup>3+</sup>,1%Sm<sup>3+</sup> phosphors ( $\lambda_{\text{em}} = 607 \text{ nm}$ ). (e) PLE spectra of NYTO:5%Dy<sup>3+</sup> ( $\lambda_{\text{em}} = 572 \text{ nm}$ ) and NYTO:3%Sm<sup>3+</sup> ( $\lambda_{\text{em}} = 607 \text{ nm}$ ) phosphors.

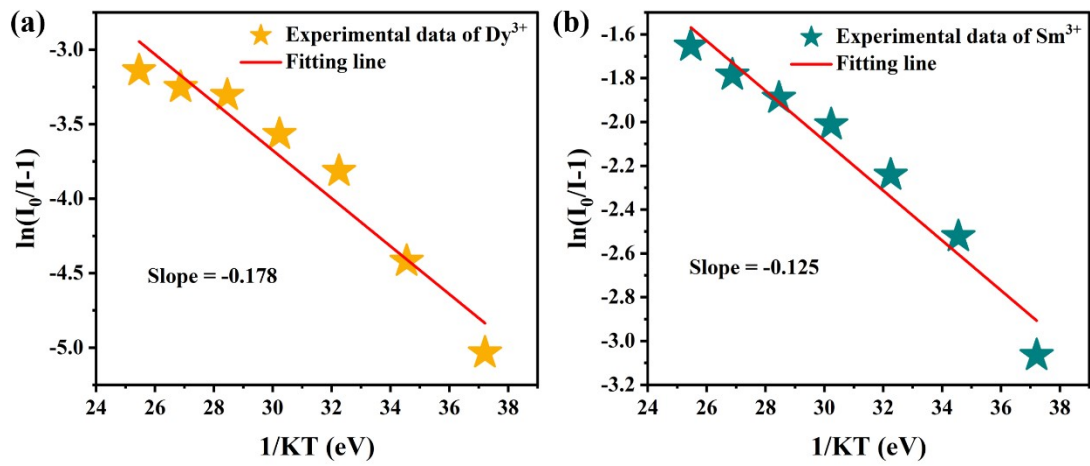

**Figure S3.** Arrhenius fitting of the integral intensity of the temperature-dependent PL spectra of (a)  $Dy^{3+}$  and (b)  $Sm^{3+}$ .

**Table 1.** The refined crystallographic parameters of NYTO host and NYTO:5%Dy<sup>3+</sup>,1%Sm<sup>3+</sup> phosphor.

| Compound           | NYTO host                 | NYTO:5%Dy <sup>3+</sup> ,1%Sm <sup>3+</sup> |
|--------------------|---------------------------|---------------------------------------------|
| Crystal structure  | orthogonal                | orthogonal                                  |
| Space group        | Pbcm (57)                 | Pbcm (57)                                   |
| Lattice parameters | a = 12.212 Å              | a = 12.232 Å                                |
|                    | b = 5.347 Å               | b = 5.345 Å                                 |
|                    | c = 5.345 Å               | c = 5.344 Å                                 |
| Unit cell volume   | V = 349.09 Å <sup>3</sup> | V = 349.39 Å <sup>3</sup>                   |
| R <sub>p</sub>     | 7.98%                     | 5.16%                                       |
| R <sub>wp</sub>    | 4.85%                     | 3.11%                                       |
| χ <sup>2</sup>     | 1.98                      | 1.61                                        |

**Table 2.** Element composition of NYTO:5%Dy<sup>3+</sup>,1%Sm<sup>3+</sup> phosphor.

| Element | Theoretical ratio (%) | Atomic ratio (%) |
|---------|-----------------------|------------------|
| Na      | 14.29                 | 13.26            |
| Y       | 13.43                 | 13.31            |
| Ti      | 14.29                 | 13.62            |
| O       | 57.14                 | 58.72            |
| Dy      | 0.71                  | 0.88             |
| Sm      | 0.14                  | 0.21             |
